# Supplementary material for: Synthesis, crystal structure and magnetic properties of novel heterobimetallic malonate-bridged MIIReIV complexes (M = Mn, Fe, Co and Ni)
Source: Royal Society of Chemistry journal article supplement (doi:10.1039/b708927a), 2007-01-01

### Supporting Information

**Figure S1.** Perspective drawing of the local coordination environment of M(II) in **1** and **2**. Thermal ellipsoids are plotted at 50% probability level, and hydrogen atoms are omitted for clarity.

**Figure S2.** Perspective view (ball and stick) of the packing of **4**, showing the shortest Cl...Cl contacts (dashed line).

**Figure S3.** Partial view along the *b* axis of **4**, showing the coordination polyhedra and the shortest Cl...Cl contacts (dashed line). Only the Cl atoms and the malonate bridge are shown.

Figure S1.

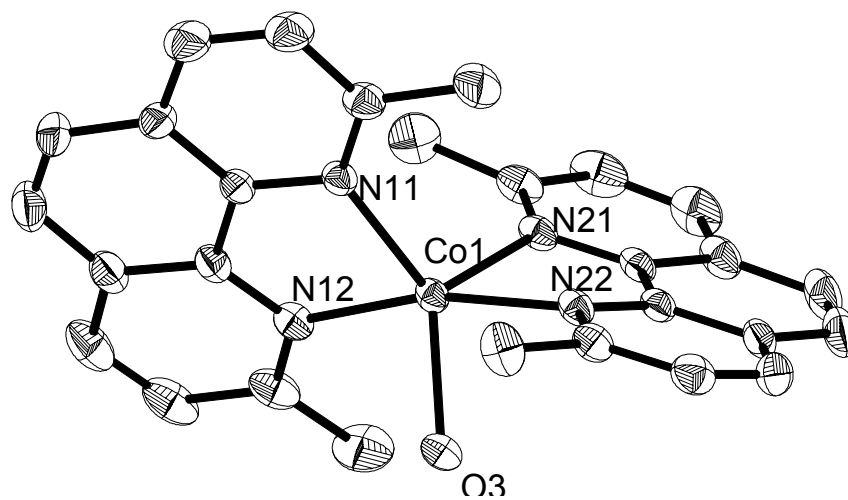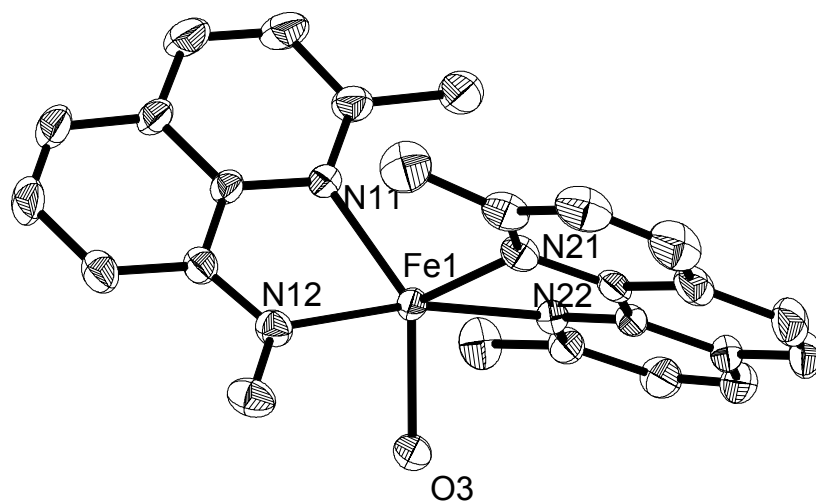

Figure S2.

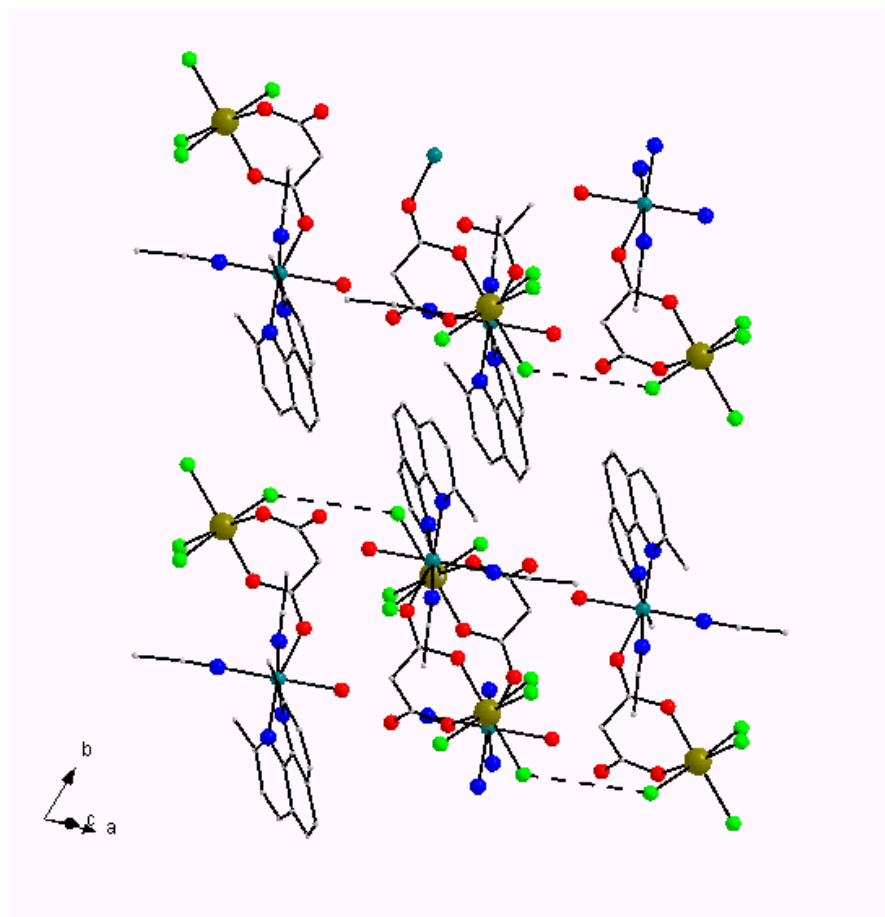

Figure S3.

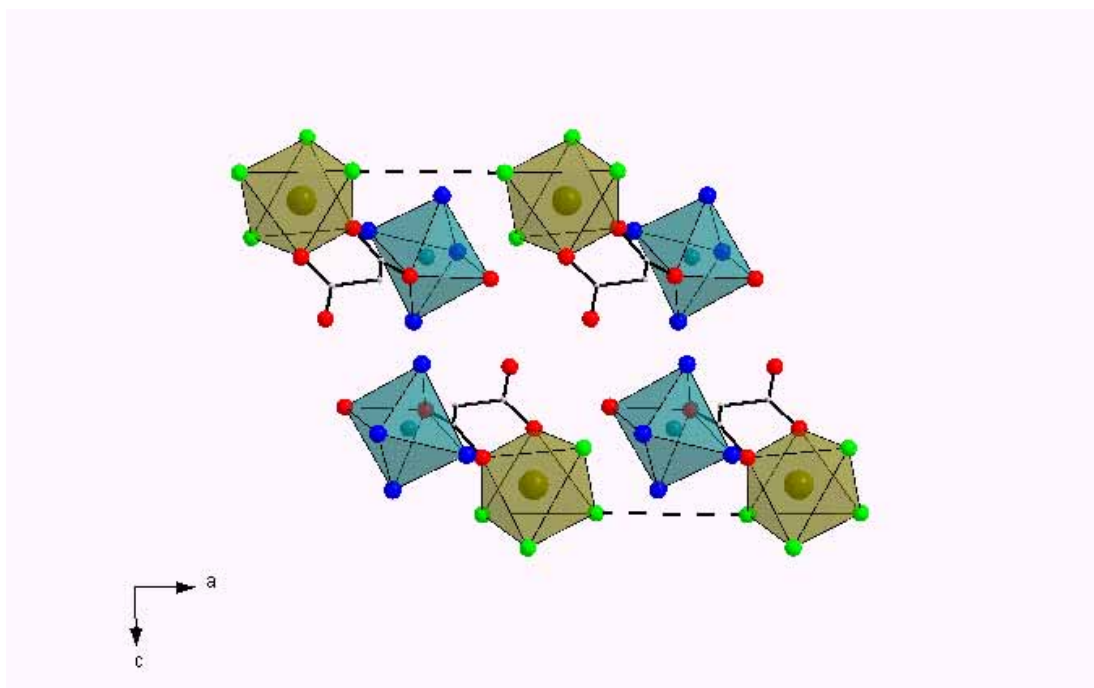

Supplement: b708927a.pdf [file b708927a.pdf]
